# Supplementary material for: The ephrin receptor EphB2 regulates the connectivity and activity of enteric neurons
Source: PubMed Central journal article supplement (PMC8569587; doi:10.1016/j.jbc.2021.101300), 2021-10-11
Supplement: mmc1.pdf [file mmc1.pdf]

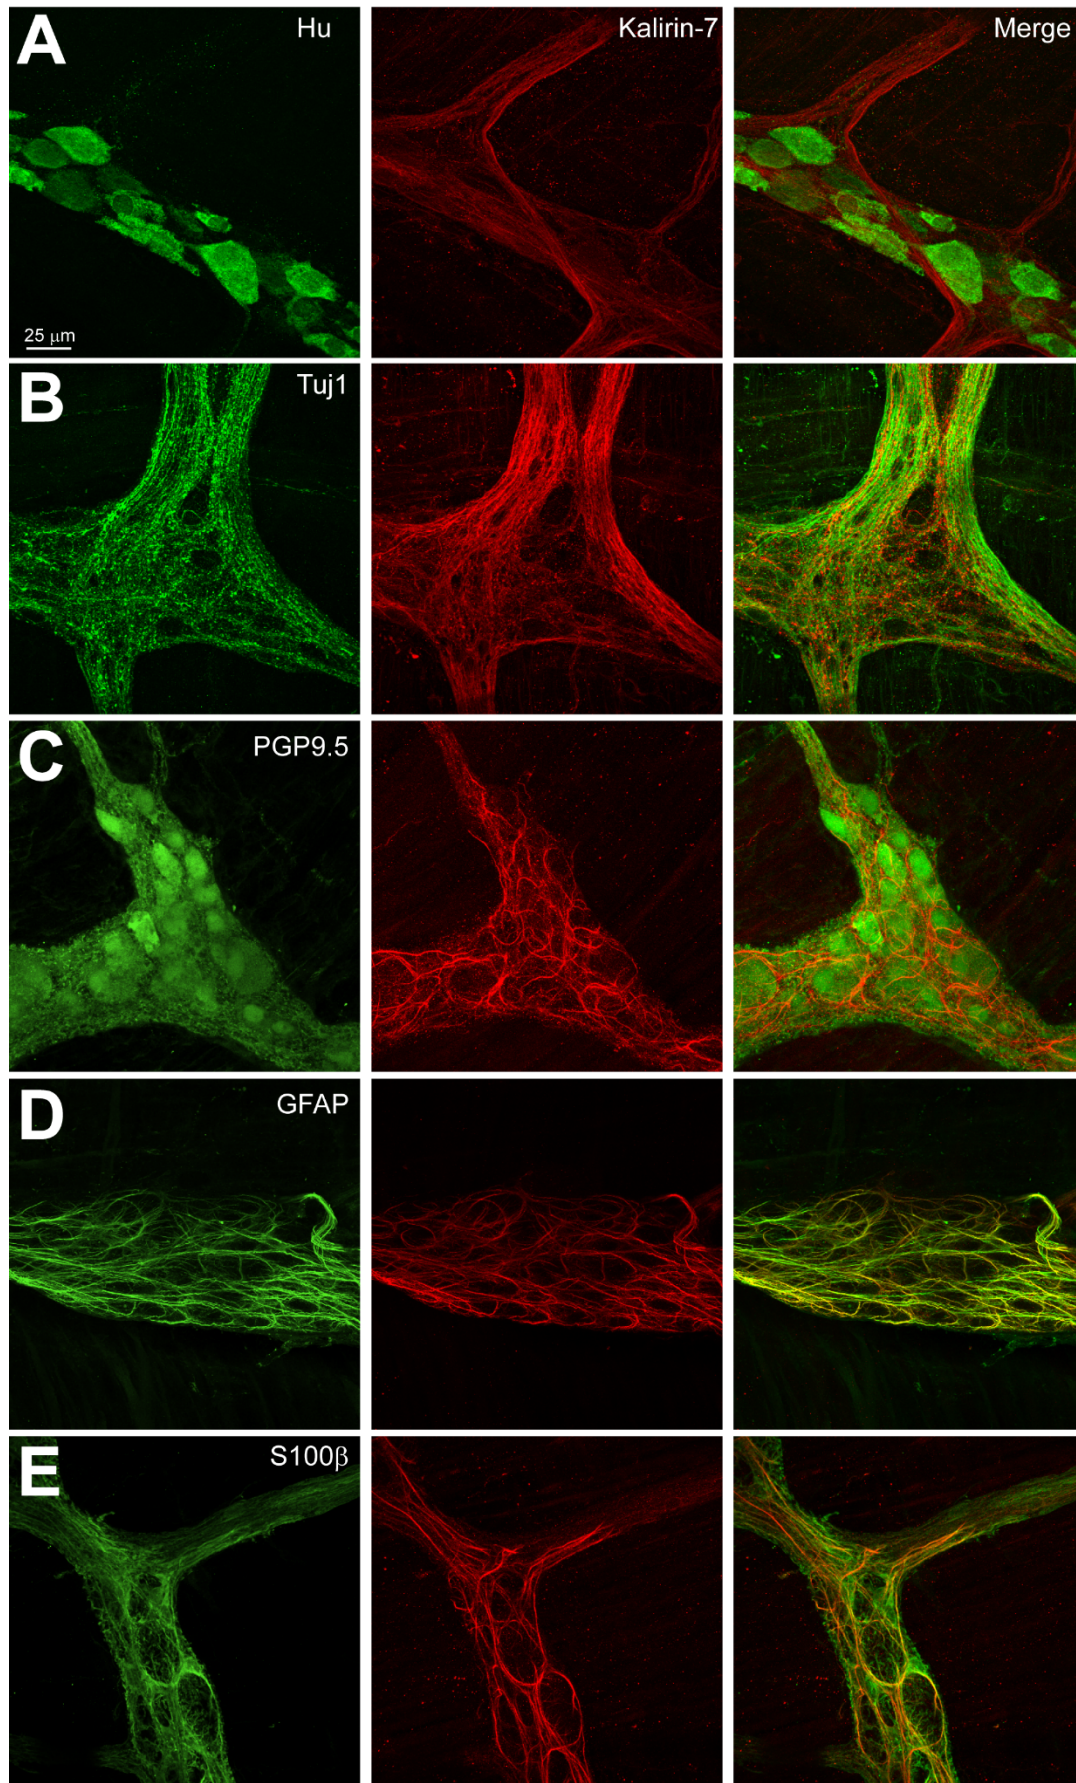

Figure S1

**Figure S1 legend.** Kalirin-7 is enriched in enteric glial cells. **A-E**, The myenteric plexus of distal colon from an adult rat (6-month-old) was double-immunostained for Kalirin-7 and HuC/D (**A**), Tuj1 (**B**), or PGP9.5 (**C**). Images show no evident colocalization of Kalirin-7 with neuronal somata. Double-immunostaining for Kalirin-7 and GFAP (**D**), or S100 $\beta$  (**E**) in a whole-mount preparation of myenteric plexus from distal colon of adult rat (6-month-old). Images show a very strong colocalization of Kalirin-7 with enteric glial cells.
